# Supplementary material for: The Phenotypic Characterization of the Oldest Italian Man from December 28, 2020, to September 23, 2021, A.T., Strengthens the Idea That the Immune System can Play a Key Role in the Attainment of Extreme Longevity
Source: MDPI journal article supplement (doi:10.3390/jcm12247591), 2023-12-09
Supplement: s1 [file s1]

Recruited September 16, 2020 at  
age of 108 years and 8 months

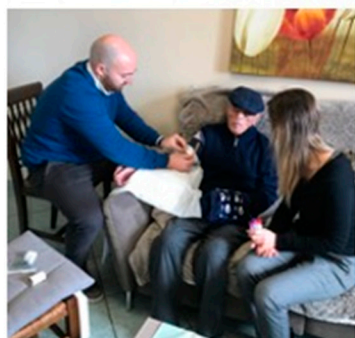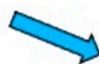

<https://www.supercentenariditalia.it/persone-viventi-piu-longeve-in-italia>

### Persone viventi più longeve in Italia

La presente lista raccoglie i casi di ultracentenari conosciuti residenti in Italia con un'età di almeno 107 anni, candidati all'età supercentenaria, con attribuzione dello stato di vita entro i 4 mesi dalla data odierna.

La presenza di altri casi sconosciuti ai curatori del sito, e quindi non elencati, non viene esclusa, anzi è ritenuto altamente probabile.

Cittadino Siciliano d'Italia è **Maria Oliva** di anni 111, nata il 18 aprile 1909 e residente a Piazza Armerina (Sicilia).

Il Decano uomo è invece **Antonino Turturici** di anni 108, nato il 18 gennaio 1912 e residente a Catibellata (Sicilia).

Per la lista delle persone più longeve morte recentemente in Italia clicca [qui](#).

| Nome                            | Sex | Data di nascita   | Sex | Luogo di nascita     | Luogo di residenza               | Stato                            | Stato | Stato |
|---------------------------------|-----|-------------------|-----|----------------------|----------------------------------|----------------------------------|-------|-------|
| 1 Maria Oliva                   | F   | 18 aprile 1909    | F   | 111 anni, 108 giorni | Sicilia, Piazza Armerina (PA)    | Sicilia, Piazza Armerina (PA)    | Q     | Q     |
| 2 Ida Donatelli                 | F   | 24 maggio 1909    | F   | 111 anni, 108 giorni | Venezia, Venezia (VE)            | Venezia, Venezia (VE)            | Q     | Q     |
| 3 Maria Antonia Di Marco        | F   | 21 ottobre 1909   | F   | 111 anni, 108 giorni | Albania, Caribona (AL)           | Albania, Caribona (AL)           | Q     | Q     |
| 4 Angela Tullerotti             | F   | 18 aprile 1910    | F   | 111 anni, 107 giorni | Lombardia, Olona e Lino (LC)     | Lombardia, Olona e Lino (LC)     | Q     | Q     |
| 5 Giuseppina Rossetti           | F   | 3 luglio 1910     | F   | 111 anni, 106 giorni | Marino, Marino (RM)              | Marino, Marino (RM)              | Q     | Q     |
| 6 Claudio Rossetti              | M   | 13 ottobre 1910   | M   | 111 anni, 106 giorni | Emilia-Romagna, Rimini (RN)      | Emilia-Romagna, Rimini (RN)      | Q     | Q     |
| 7 Lucia Leone Sangalli          | F   | 12 dicembre 1910  | F   | 111 anni, 105 giorni | Campania, Salerno (SA)           | Campania, Salerno (SA)           | Q     | Q     |
| 8 Maria Casali                  | F   | 11 dicembre 1910  | F   | 111 anni, 105 giorni | Emilia-Romagna, Emilia (RM)      | Emilia-Romagna, Emilia (RM)      | Q     | Q     |
| 9 Giuseppe (Giuseppe)           | M   | 11 dicembre 1910  | M   | 111 anni, 105 giorni | Sicilia, Palermo                 | Sicilia, San Vito e M. (PA)      | Q     | Q     |
| 10 Anna Maria Giuseppina Casali | F   | 24 gennaio 1911   | F   | 111 anni, 107 giorni | Campania, Salerno (SA)           | Campania, Salerno (SA)           | Q     | Q     |
| 11 Ida Casali                   | F   | 28 gennaio 1911   | F   | 111 anni, 106 giorni | Venezia, Pieve di Cadore (VE)    | Lombardia, Milano (MI)           | Q     | Q     |
| 12 Lulda Gatti                  | F   | 28 gennaio 1911   | F   | 111 anni, 106 giorni | Lombardia, Milano                | Lombardia, Milano                | Q     | Q     |
| 13 Ida Pizzoni                  | F   | 30 gennaio 1911   | F   | 111 anni, 107 giorni | Emilia-Romagna, Cesena (FC)      | Emilia-Romagna, Cesena (FC)      | Q     | Q     |
| 14 Maria De Vito                | F   | 4 febbraio 1911   | F   | 111 anni, 106 giorni | Campania, Napoli (NA)            | Campania, Napoli (NA)            | Q     | Q     |
| 15 Lucia Scialpi                | F   | 17 aprile 1911    | F   | 111 anni, 105 giorni | Venezia, Venezia (VE)            | Venezia, Venezia (VE)            | Q     | Q     |
| 16 Giuseppina Salvo             | F   | 17 giugno 1911    | F   | 111 anni, 105 giorni | Campania, Napoli                 | Campania, Napoli                 | Q     | Q     |
| 17 Gilda Sisti                  | F   | 3 luglio 1911     | F   | 111 anni, 105 giorni | Emilia-Romagna, Modena (MO)      | Lombardia, Bergamo (BG)          | Q     | Q     |
| 18 Rosa Casali                  | F   | 29 luglio 1911    | F   | 111 anni, 104 giorni | Lombardia, Piacenza (PC)         | Venezia, Venezia                 | Q     | Q     |
| 19 Giovanni Dardi               | M   | 26 settembre 1911 | M   | 111 anni, 104 giorni | Luigi, Repubblica Romana (RM)    | Luigi, Roma                      | Q     | Q     |
| 20 Giuseppina Spagnoli          | F   | 30 settembre 1911 | F   | 111 anni, 104 giorni | Emilia-Romagna, Castiglione (PC) | Emilia-Romagna, Castiglione (PC) | Q     | Q     |
| 21 Ida Romagnoli                | F   | 8 novembre 1911   | F   | 111 anni, 103 giorni | Umbria, La Spezia                | Umbria, La Spezia                | Q     | Q     |
| 22 Lucia Spagnoli               | F   | 8 novembre 1911   | F   | 111 anni, 103 giorni | Umbria, Città di Castello (PG)   | Umbria, Città di Castello (PG)   | Q     | Q     |
| 23 Anna Rossi                   | F   | 22 novembre 1911  | F   | 111 anni, 103 giorni | Luigi, Roma (RM)                 | Luigi, Roma (RM)                 | Q     | Q     |
| 24 Agostina Pizzoni             | F   | 22 novembre 1911  | F   | 111 anni, 103 giorni | Venezia, Venezia (VE)            | Venezia, Venezia (VE)            | Q     | Q     |
| 25 Francesco Pizzoni            | M   | 11 gennaio 1912   | M   | 111 anni, 102 giorni | Sicilia, Siracusa (SR)           | Sicilia, Siracusa (SR)           | Q     | Q     |
| 26 Rosa Rossi                   | F   | 11 gennaio 1912   | F   | 111 anni, 102 giorni | Umbria, San Pancrazio (RM)       | Umbria, San Pancrazio (RM)       | Q     | Q     |
| 27 Antonino Turturici           | M   | 18 gennaio 1912   | M   | 111 anni, 102 giorni | Sicilia, Catibellata (PA)        | Sicilia, Catibellata (PA)        | Q     | Q     |
| 28 Maria Rossi                  | F   | 22 gennaio 1912   | F   | 111 anni, 102 giorni | Sicilia, Siracusa (SR)           | Sicilia, Siracusa (SR)           | Q     | Q     |

**Supplementary Figure S1.** Recruitment and age validation of Mr. Antonino Turturici. The website <https://www.supercentenariditalia.it/persone-viventi-piu-longeve-in-italia>, curated by Dr. De Lucchi, includes the names of known supercentenarians residing in Italy who are at least 107 years old, with proof of their current status. All cases are validated through in-person or remote verification of the individual's identity card.
